# Supplementary material for: Comorbidities and treatment outcomes in multidrug resistant tuberculosis: a systematic review and meta-analysis
Source: PubMed Central journal article supplement (PMC5862834; doi:10.1038/s41598-018-23344-z), 2018-03-21
Supplement: 41598_2018_23344_MOESM1_ESM.pdf [file 41598_2018_23344_MOESM1_ESM.pdf]

**Full Title:** Comorbidities and treatment outcomes in multidrug resistant tuberculosis: a systematic review and meta-analysis

**Short Title:** Treatment outcomes in MDR/XDRTB

**Authors and Credentials:**

- 1) Joel Philip Samuels<sup>1</sup>, BSc, MD (Corresponding Author)
  - a. Email: [j.samuels@alumni.ubc.ca](mailto:j.samuels@alumni.ubc.ca)
- 2) Aashna Sood<sup>2</sup>
- 3) Jonathon R. Campbell<sup>3</sup>, BSc
- 4) Faiz Ahmad Khan<sup>4,5,6</sup>, MD, MPH
- 5) James Cameron Johnston<sup>7,8</sup>, MD, MPH (Alternate Corresponding Author)
  - a. Email: [James.Johnston@bccdc.ca](mailto:James.Johnston@bccdc.ca)

**Affiliations:**

1. Faculty of Medicine, University of British Columbia, Vancouver, British Columbia, Canada.
2. Royal College of Surgeons in Ireland, Dublin, Ireland.
3. Faculty of Pharmaceutical Sciences, University of British Columbia, Vancouver, British Columbia, Canada.
4. Respiratory Epidemiology & Clinical Research Unit, Centre for Outcomes Research and Evaluation, MUHC-RI, Montreal, Quebec, Canada.

5. Division of Respiratory Medicine, McGill University Health Centre, Montreal, Quebec, Canada.
6. McGill International TB Centre, Montreal, Quebec, Canada.
7. TB Services, BC Centre for Disease Control, Vancouver, British Columbia, Canada.
8. Division of Respiratory Medicine, University of British Columbia, Vancouver, British Columbia, Canada.

**Registration:** Protocol Registered in Prospero:

[http://www.crd.york.ac.uk/PROSPERO/display\\_record.asp?ID=CRD42016039866](http://www.crd.york.ac.uk/PROSPERO/display_record.asp?ID=CRD42016039866)

**Conflicts of Interest:** No authors have any relevant conflict of interests.

**Supplemental Figure and Table Legend:**

**Supp. Appendix:** Literature Review Search Strategy.

**Supp. Fig. 1:** Funnel plot for the effect of HIV on the primary outcome in MDR/XDRTB.

**Supp. Fig. 2:** Funnel plot for the effect of DM on the primary outcome in MDR/XDRTB.

**Supp. Fig. 3:** Funnel plot for the effect of smoking on the primary outcome in MDR/XDRTB.

**Supp. Fig. 4:** Funnel plot showing the effect of alcohol misuse on the primary outcome in MDR/XDRTB.

**Supp. Fig. 5:** Relative Risk of the primary outcome in MDR/XDRTB in those with and without DM in high GDP Countries.

**Supp. Fig. 6:** Relative Risk of the primary outcome in MDR/XDRTB in those with and without DM in low GDP Countries.

**Supp. Fig. 7:** Relative Risk of the primary outcome in MDR/XDRTB in those with and without DM from low to high quality study.

**Supp. Fig. 8:** Relative Risk of Default in MDR/XDRTB in those with HIV compared to those without HIV.

**Supp. Fig. 9:** Relative Risk of Treatment Failure in MDR/XDRTB among those with HIV compared to those without HIV.

**Supp. Fig. 10:** Relative Risk of Death/Failure in MDR/XDRTB in those with HIV compared those with and without HIV.

**Supp. Fig. 11:** Relative Risk of the primary outcome in MDR/XDRTB comparing those with and without HIV from low to high study quality.

**Supp. Fig. 12:** Relative Risk of the primary outcome in MDR/XDRTB comparing those with and without HIV in high GDP countries.

**Supp. Fig. 13:** Relative Risk of the primary outcome in MDR/XDRTB comparing those with and without HIV in low GDP countries.

**Supp. Fig. 14:** Relative Risk of the primary outcome in MDR/XDRTB comparing those with and without HIV from lowest to highest ART use.

**Supp. Fig. 15:** Relative Risk of the primary outcome in MDR/XDRTB comparing smokers and non-smokers from low to high quality study.

**Supp. Fig. 16:** Relative Risk of the primary outcome in MDR/XDRTB comparing smokers and non-smokers in high GDP countries.

**Supp. Fig. 17:** Relative Risk of the primary outcome in MDR/XDRTB comparing smokers and non-smokers in low GDP countries.

**Supp. Fig. 18:** Relative Risk of the primary outcome in MDR/XDRTB in those with alcohol misuse (AM) compared to those without alcohol misuse from low to high study quality.

**Supp. Fig. 19:** Relative Risk of the primary outcome in MDR/XDRTB in those with alcohol misuse (AM) compared to those without alcohol misuse in high GDP countries.

**Supp. Fig. 20:** Relative Risk of the primary outcome in MDR/XDRTB in those with alcohol misuse (AM) compared to those without alcohol misuse in low GDP countries.

**Supp. Table 1:** Proportion of data missing amongst participants with DM.

**Supp. Table 2:** Proportion of data missing amongst participants with HIV.

**Supp. Table 3:** Proportion of data missing amongst participants that smoke.

**Supp. Table 4:** Proportion of data missing amongst participants with alcohol misuse.

**Supp. Table 5:** Proportion of participants with HIV on ART.

**Supp. Table 6:** Definition of smoker used in study.

**Supp. Table 7:** Effect estimates for combined negative treatment outcomes in participants with DM from studies that did not provide raw data.

**Supp. Table 8:** Effect estimates for combined negative treatment outcomes in participants with HIV from studies that did not provide raw data.

**Supp. Table 9:** Effect estimates for combined negative treatment outcomes in participants that smoked from studies that did not provide raw data.

**Supp. Table 10:** Effect estimates combined negative treatment outcomes in participants with alcohol misuse from studies that did not provide raw data.

## Appendix:

**Search Strategy:** We will conduct the following searches for each of the listed databases.

### MEDLINE via OVID SP

1. Exp Tuberculosis, Multidrug-Resistant/
2. MDRTB.mp.
3. MDR TB.mp.
4. MDR-TB.mp.
5. MDR Tuberculosis.mp.
6. Multi\*drug resistan\* TB.mp.
7. Multi\*drug resistan\* Tuberculosis.mp.
8. (tuberculosis adj10 multi\* drug resistan\*).mp.
9. (tuberculosis adj10 MDR).mp.
10. (TB adj10 MDR).mp.
11. (TB adj10 multi\* drug resistan\*).mp.
12. extensive\* drug resistan\* tuberculosis.mp.
13. extensive\* drug resistan\* TB.mp.
14. XDR Tuberculosis.mp.
15. XDR TB.mp.
16. XDR-TB.mp.
17. XDRTB.mp.
18. (tuberculosis adj10 extensive\* drug resistan\*).mp.
19. (tuberculosis adj10 XDR).mp.
20. (TB adj10 XDR).mp.
21. (TB adj10 extensive\* drug resistan\*).mp.
22. exp Extensively Drug-Resistant Tuberculosis/
23. exp Treatment Outcome/
24. outcom\*.mp.
25. 1 or 2 or 3 or 4 or 5 or 6 or 7 or 8 or 9 or 10 or 11 or 12 or 13 or 14 or 15 or 16 or 17 or 18 or 19 or 20 or 21 or 22
26. 23 or 24
27. 25 AND 26
28. limit 27 to English, French or Spanish language, Humans and 1980-2016

### EMBASE via OVID SP

1. exp multidrug resistant Tuberculosis/
2. MDRTB.mp.
3. MDR TB.mp.
4. MDR-TB.mp.
5. Multi\*drug resistan\* TB.mp.
6. Multi\*drug resistan\* Tuberculosis.mp.
7. MDR Tuberculosis.mp.

8. (tuberculosis adj10 MDR).mp.
9. (tuberculosis adj10 multi\* drug resistan\*).mp.
10. (TB adj10 MDR).mp.
11. (TB adj10 multi\* drug resistan\*).mp.
12. exp extensively drug resistant tuberculosis/
13. extensive\* drug resistan\* TB.mp.
14. extensive\* drug resistan\* Tuberculosis.mp.
15. XDR Tuberculosis.mp.
16. XDRTB.mp.
17. XDR TB.mp.
18. XDR-TB.mp.
19. (tuberculosis adj10 extensive\* drug resistan\*).mp.
20. (tuberculosis adj10 XDR).mp.
21. (TB adj10 extensive\* drug resistan\*).mp.
22. (TB adj10 XDR).mp.
23. exp Treatment outcome/
24. outcom\*.mp.
25. 1 or 2 or 3 or 4 or 5 or 6 or 7 or 8 or 9 or 10 or 11 or 12 or 13 or 14 or 15 or 16 or 17 or 18 or 19 or 20 or 21 or 22
26. 23 or 24
27. 25 AND 26
28. Limit 27 to English, French or Spanish language, Humans and 1980-2016

#### Cochrane Database of Systematic reviews via OVID

1. Multi\*drug resistan\* tuberculosis.mp.
2. Extensive\* drug resistan\* tuberculosis.mp.
3. XDR-TB.mp.
4. XDR TB.mp.
5. MDR TB.mp.
6. MDR-TB.mp.
7. (tuberculosis adj10 MDR).mp.
8. (tuberculosis adj10 multi\* drug resistan\*).mp.
9. (TB adj10 multi\* drug resistan\*).mp.
10. (TB adj10 MDR).mp.
11. (tuberculosis adj10 XDR).mp.
12. (tuberculosis adj10 extensive\* drug resistan\*).mp.
13. (TB adj10 XDR).mp.
14. (TB adj10 extensive\* drug resistan\*).mp.
15. 1 or 2 or 3 or 4 or 5 or 6 or 7 or 8 or 9 or 10 or 11 or 12 or 13 or 14

#### Cochrane Central Register of Controlled Trials via OVID

1. exp Tuberculosis, Multidrug-Resistant/
2. exp Extensively Drug-Resistant Tuberculosis/
3. extensive\* drug resistan\* Tuberculosis.mp.



4. extensive\* drug resistan\* TB.mp.
5. XDRTB.mp.
6. XDR-TB.mp.
7. XDR TB.mp.
8. XDR Tuberculosis.mp.
9. MDRTB.mp.
10. MDR-TB.mp.
11. MDR TB.mp.
12. MDR Tuberculosis.mp.
13. Multi\*drug resistan\* Tuberculosis.mp.
14. Multi\*drug resistan\* TB.mp.
15. (tuberculosis adj10 extensive\* drug resistan\*).mp.
16. (tuberculosis adj10 XDR).mp.
17. (tuberculosis adj10 MDR).mp.
18. (tuberculosis adj10 multi\* drug resistan\*).mp.
19. (TB adj10 XDR).mp.
20. (TB adj10 extensive\* drug resistan\*).mp.
21. (TB adj10 multi\* drug resistan\*).mp.
22. (TB adj10 MDR).mp.
23. 1 or 2 or 3 or 4 or 5 or 6 or 7 or 8 or 9 or 10 or 11 or 12 or 13 or 14 or 15 or 16 or 17 or 18 or 19 or 20 or 21 or 22
24. Limit 19 to English, French or Spanish Languages and 1980-2016

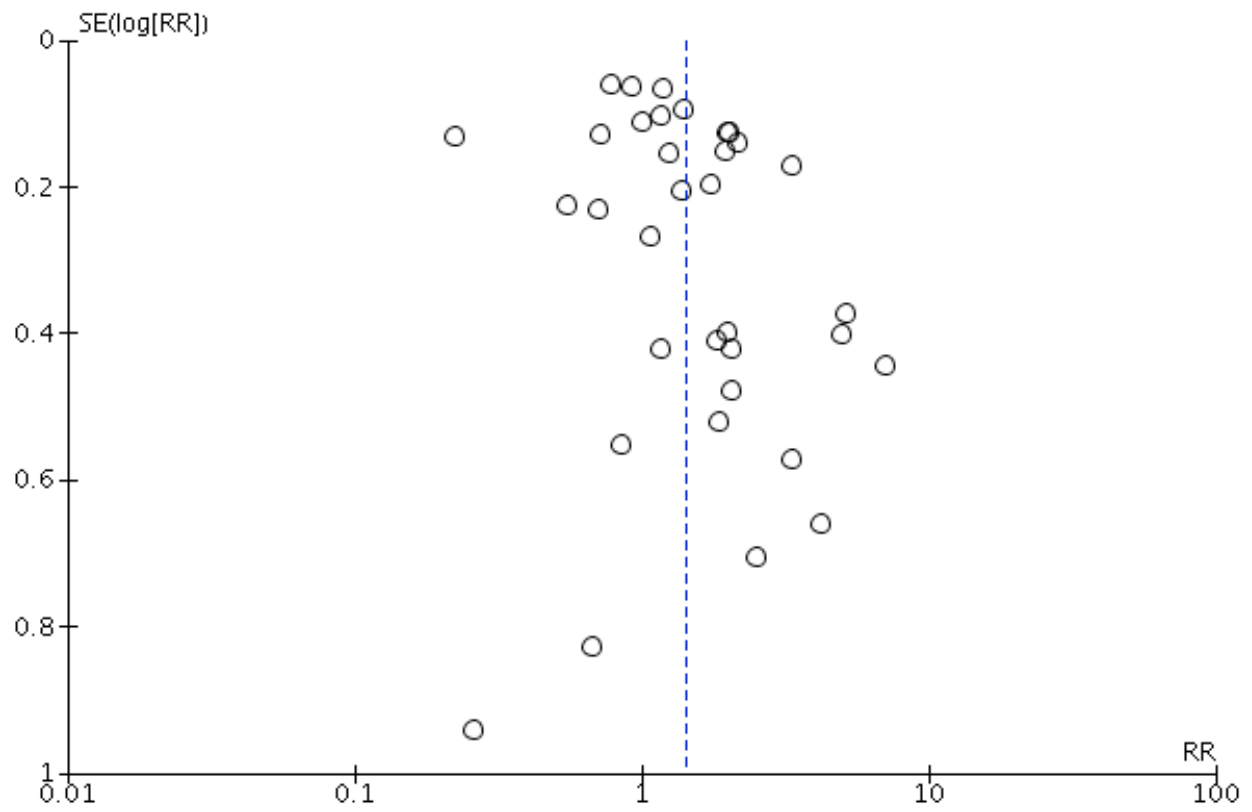

**Supp. Fig. 1:** Funnel plot for the effect of HIV on the primary outcome in MDR/XDRTB.

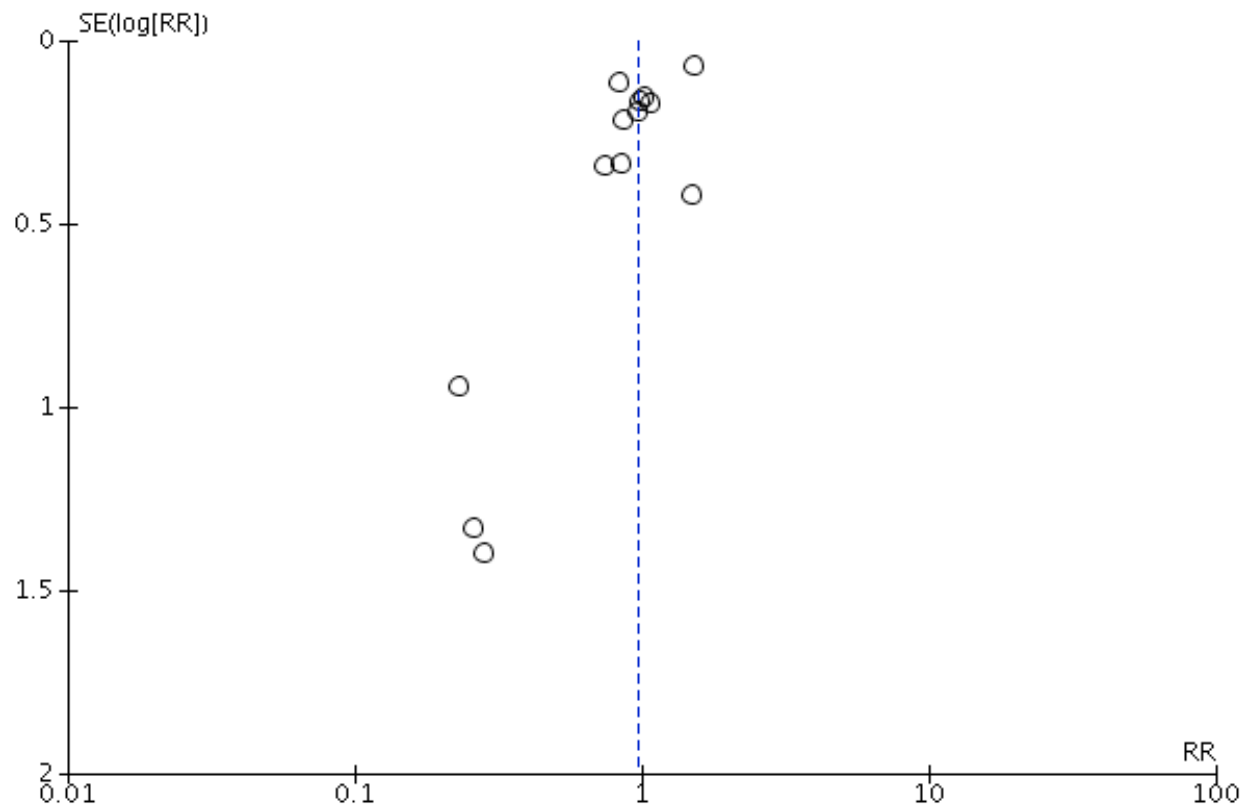

**Supp. Fig. 2:** Funnel plot for the effect of DM on the primary outcome in MDR/XDRTB.

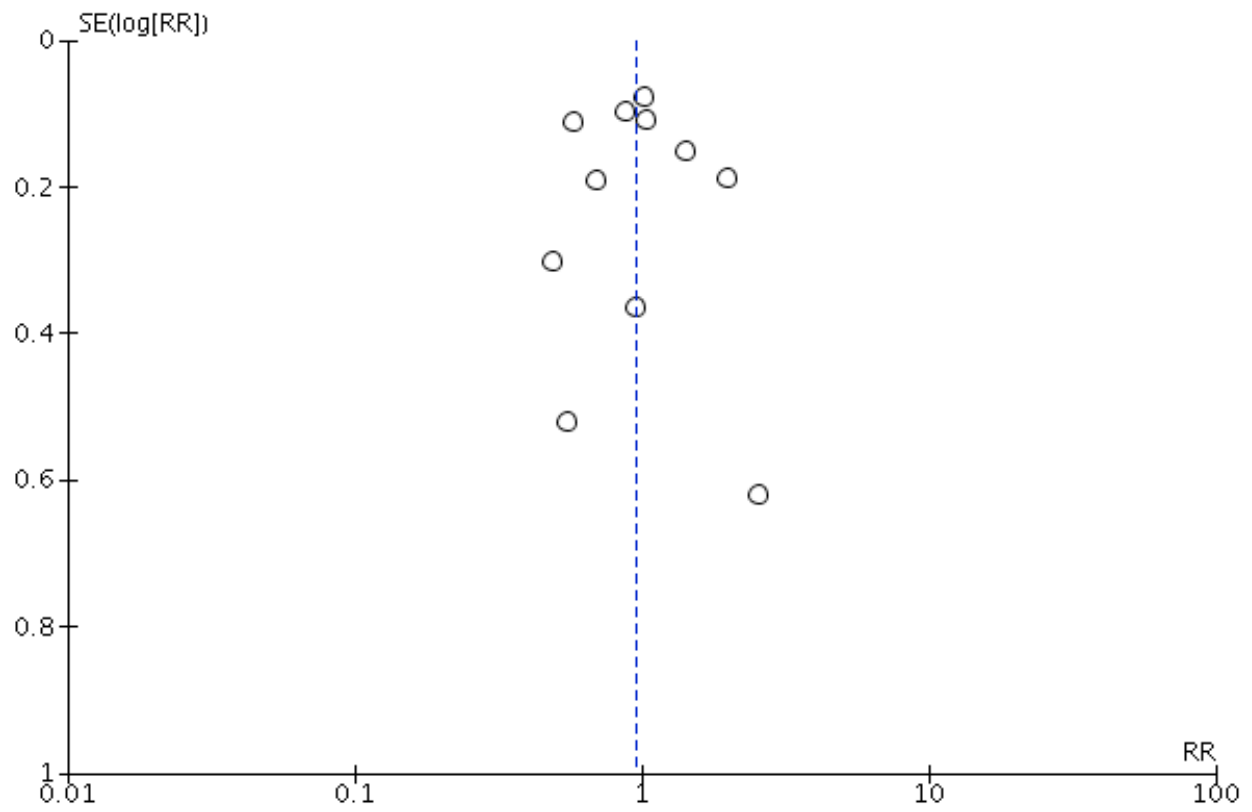

**Supp. Fig. 3:** Funnel plot for the effect of smoking on the primary outcome in MDR/XDRTB.

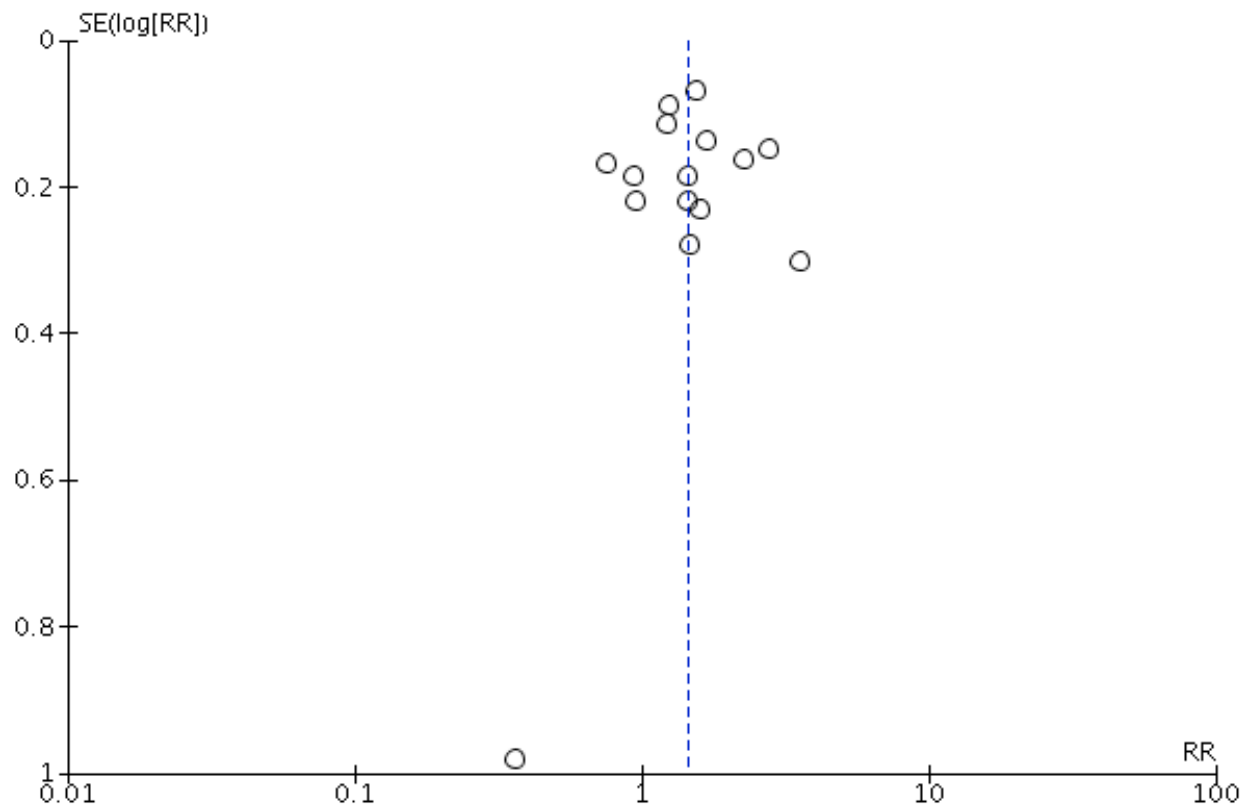

**Supp. Fig. 4:** Funnel plot showing the effect of alcohol misuse on the primary outcome in MDR/XDRTB.

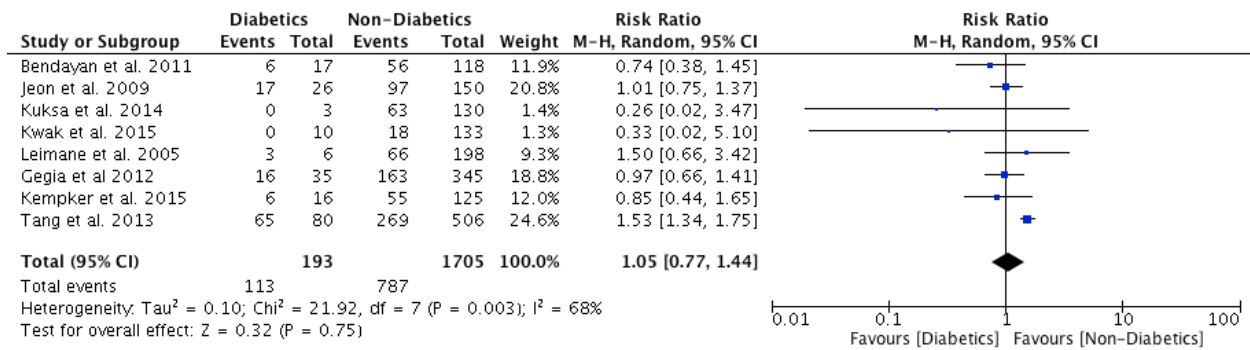

**Supp. Fig. 5:** Relative Risk of the primary outcome in MDR/XDRTB in those with and without DM in high GDP Countries.

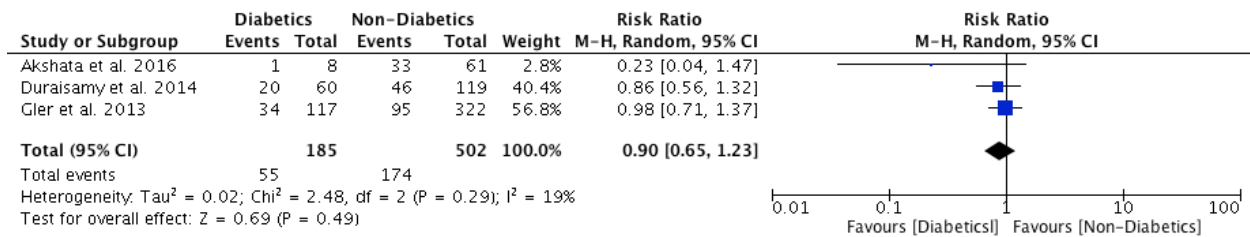

**Supp. Fig. 6:** Relative Risk of the primary outcome in MDR/XDRTB in those with and without DM in low GDP Countries.

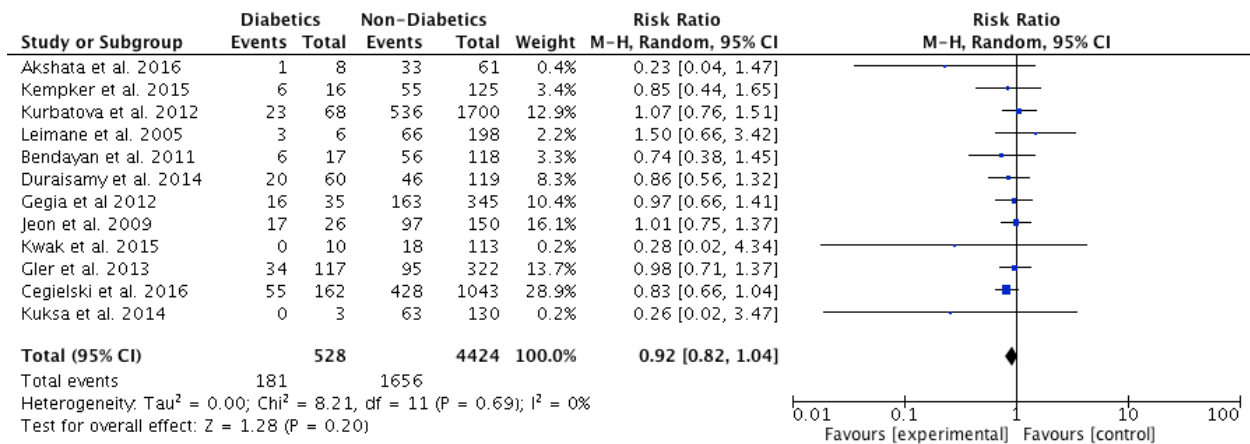

**Supp. Fig. 7:** Relative Risk of the primary outcome in MDR/XDRTB in those with and without DM from low to high quality study.



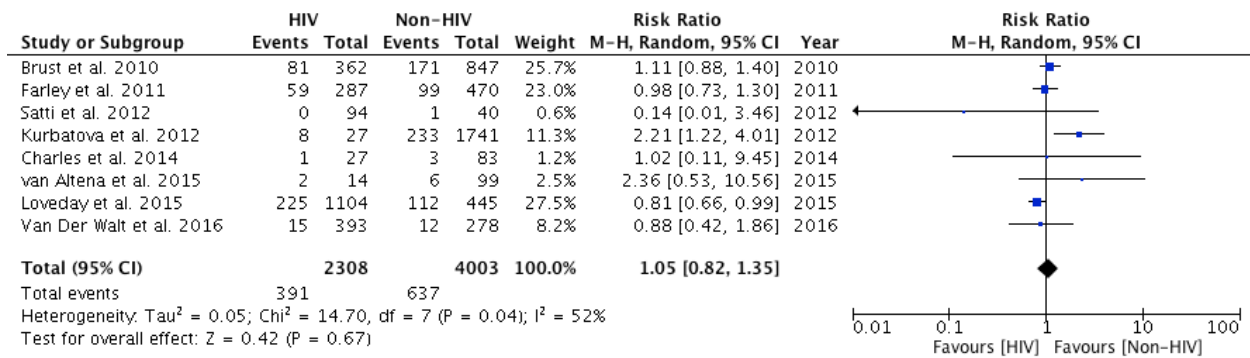

**Supp. Fig. 8:** Relative Risk of Default in MDR/XDR TB in those with HIV compared to those without HIV.

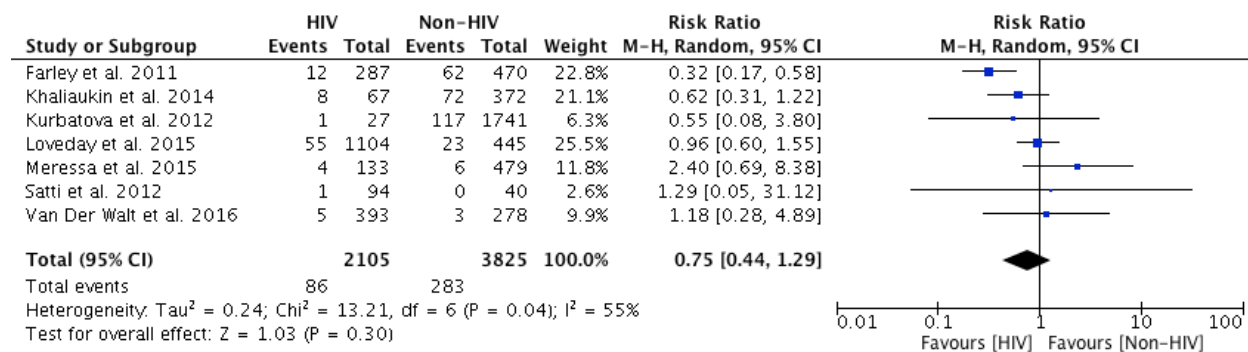

**Supp. Fig. 9:** Relative Risk of Treatment Failure in MDR/XDRTB among those with HIV compared to those without HIV.

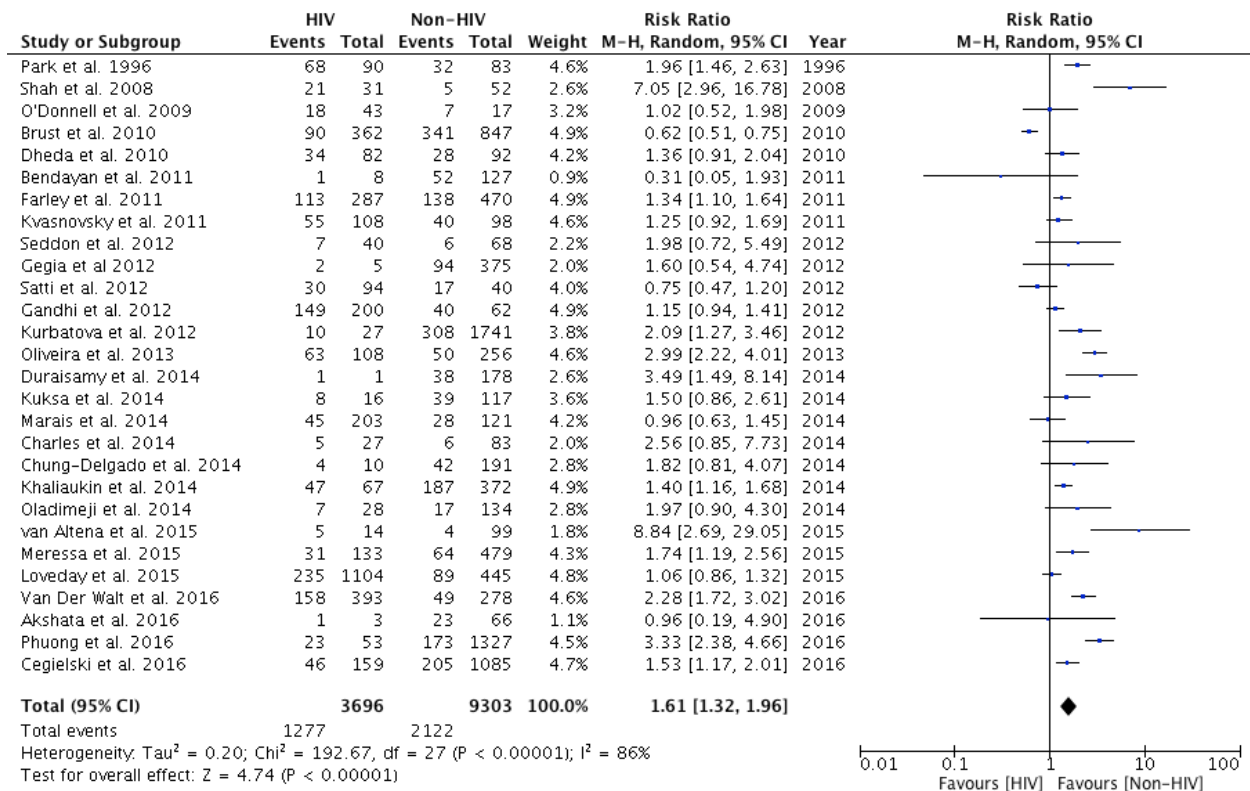

**Supp. Fig. 10:** Relative Risk of Death/Failure in MDR/XDRTB in those with HIV compared those with and without HIV.

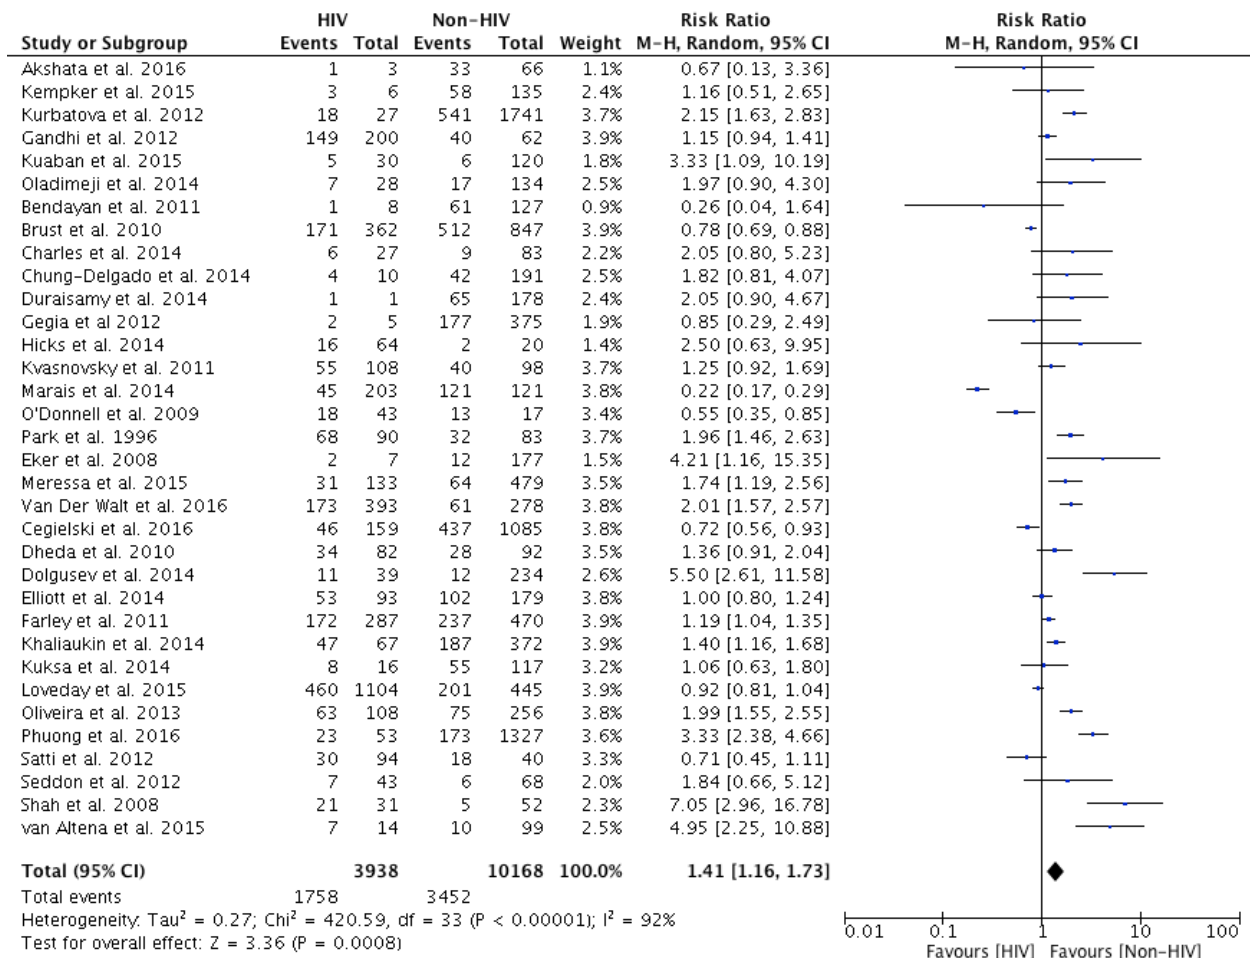

**Supp. Fig. 11:** Relative Risk of the primary outcome in MDR/XDRTB comparing those with and without HIV from low to high study quality.

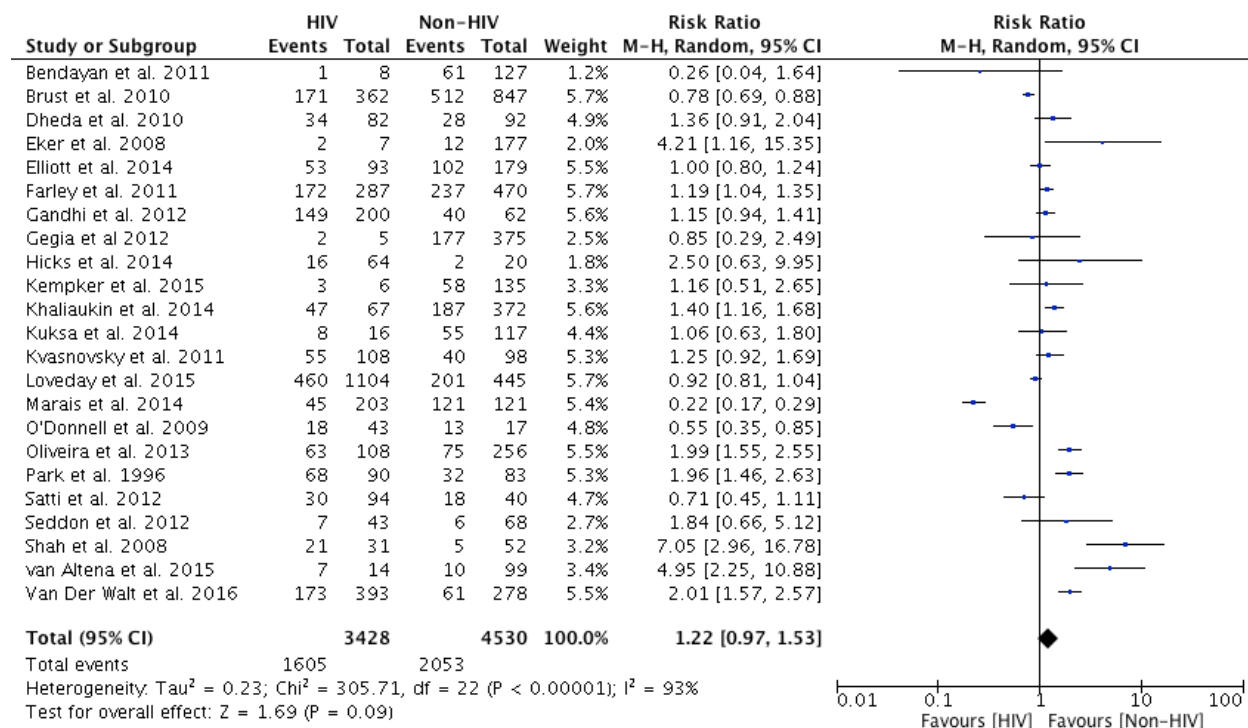

**Supp. Fig. 12:** Relative Risk of the primary outcome in MDR/XDRTB comparing those with and without HIV in high GDP countries.

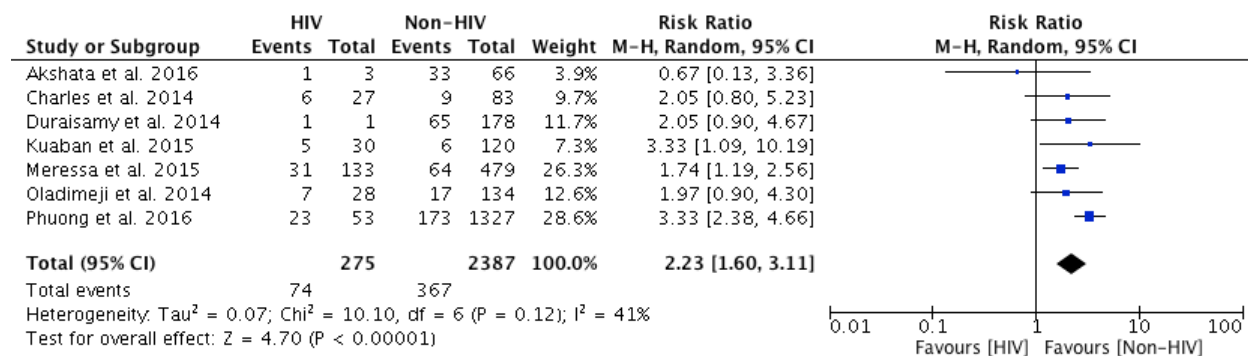

**Supp. Fig. 13:** Relative Risk of the primary outcome in MDR/XDRTB comparing those with and without HIV in low GDP countries.

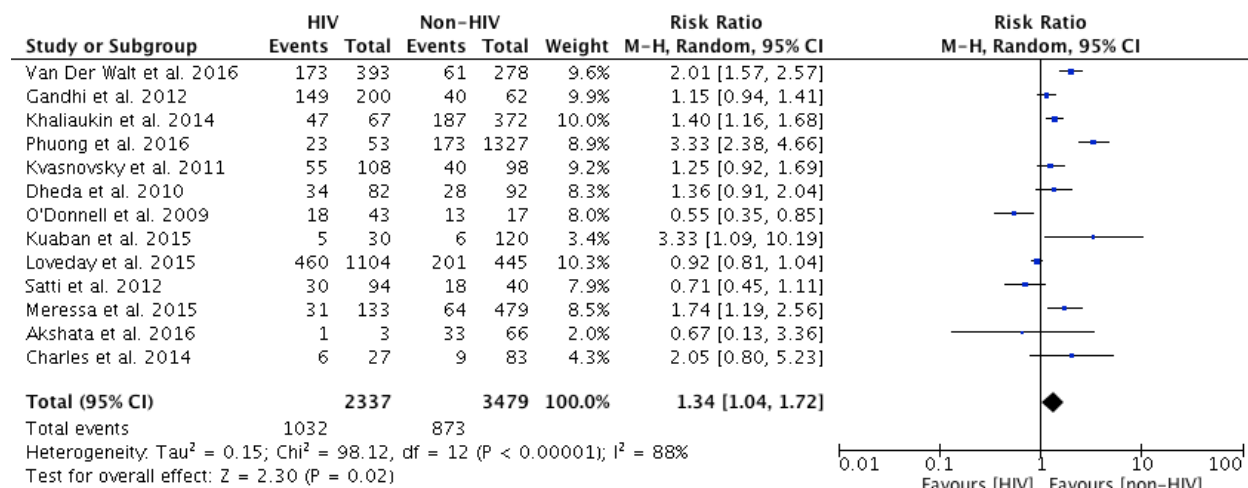

**Supp. Fig. 14:** Relative Risk of the primary outcome in MDR/XDRTB comparing those with and without HIV from lowest to highest ART use.

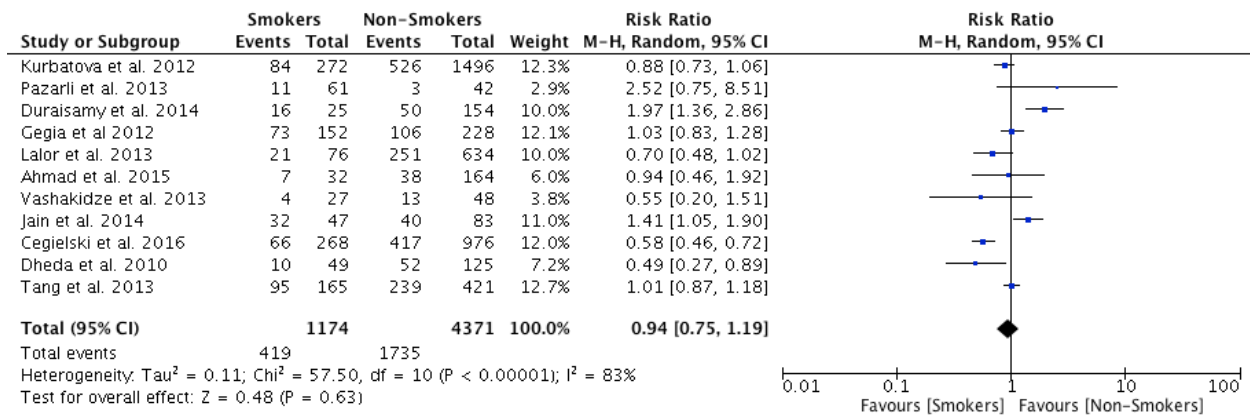

**Supp. Fig. 15:** Relative Risk of the primary outcome in MDR/XDRTB comparing smokers and non-smokers from low to high quality study.



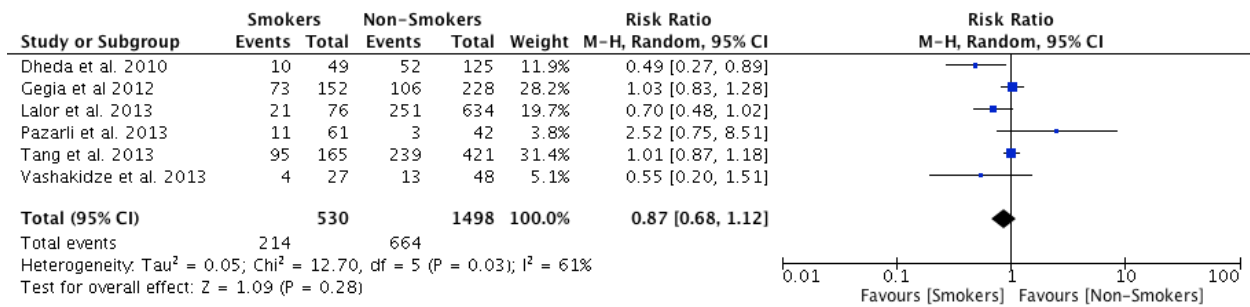

**Supp. Fig. 16:** Relative Risk of the primary outcome in MDR/XDRTB comparing smokers and non-smokers in high GDP countries.

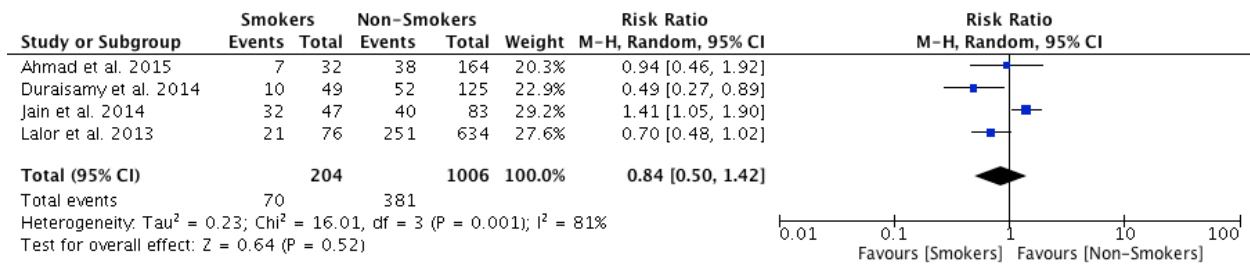

**Supp. Fig. 17:** Relative Risk of the primary outcome in MDR/XDRTB comparing smokers and non-smokers in low GDP countries.

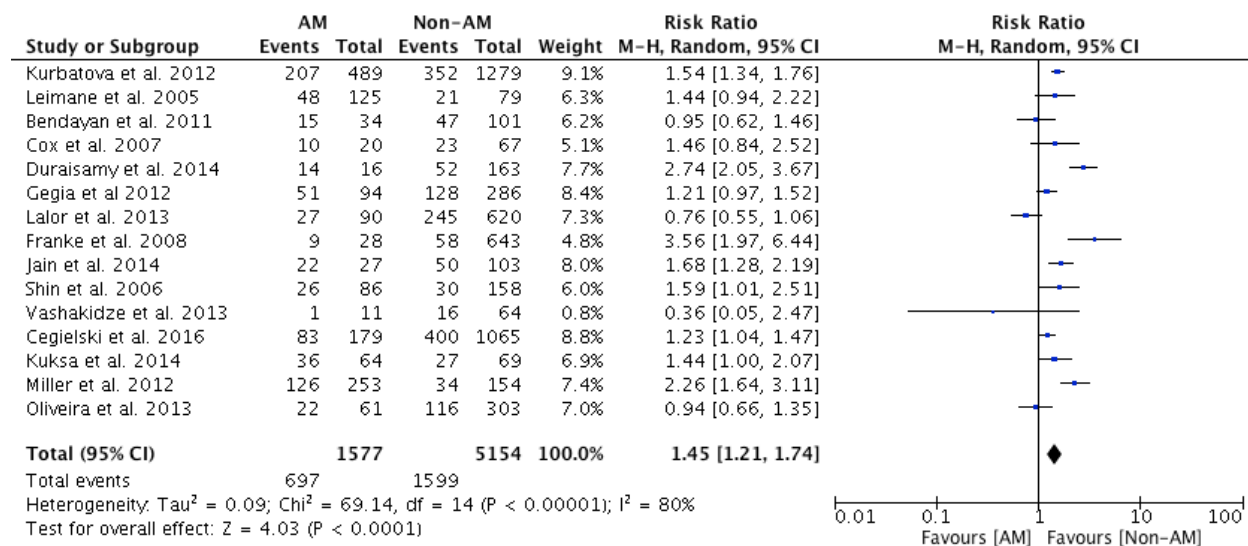

**Supp. Fig. 18:** Relative Risk of the primary outcome in MDR/XDRTB in those with alcohol misuse (AM) compared to those without alcohol misuse from low to high study quality.

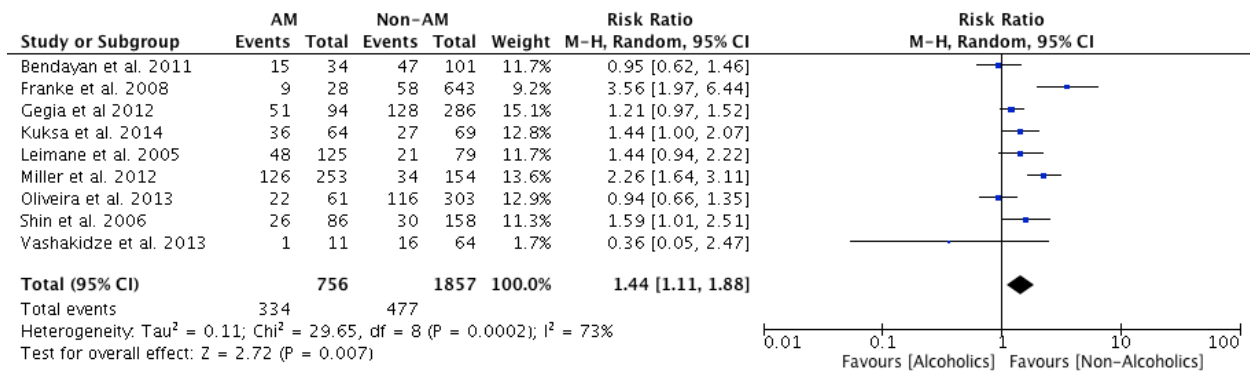

**Supp. Fig. 19:** Relative Risk of the primary outcome in MDR/XDRTB in those with alcohol misuse (AM) compared to those without alcohol misuse in high GDP countries.

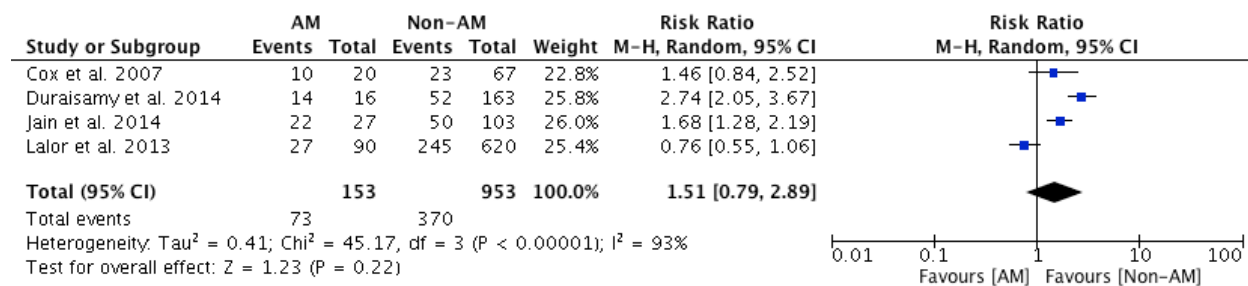

**Supp. Fig. 20:** Relative Risk of the primary outcome in MDR/XDRTB in those with alcohol misuse (AM) compared to those without alcohol misuse in low GDP countries.

**Data Missing (default/data  
unaccounted for/lost to  
follow up/transfer out)**

|                                                          |      |
|----------------------------------------------------------|------|
| <b>Akshata <i>et al.</i> 2016 [82]</b>                   | N/A  |
| <b>Bendayan <i>et al.</i> 2011 [63]</b>                  | N/A  |
| <b>Cegielski <i>et al.</i> 2016 [14]</b>                 | 0.19 |
| <b>Gegia <i>et al.</i> 2012 [45]</b>                     | N/A  |
| <b>Gler <i>et al.</i> 2013 [80]</b>                      | N/A  |
| <b>Jeon <i>et al.</i> 2009 [73]</b>                      | 0.23 |
| <b>Kempker <i>et al.</i> 2015 [44]</b>                   | N/A  |
| <b>Kuksa <i>et al.</i> 2014 (XDR<br/>data only) [60]</b> | N/A  |
| <b>Kurbatova <i>et al.</i> 2012 [68]</b>                 | 0.12 |
| <b>Kwak <i>et al.</i> 2015 [10]</b>                      | N/A  |
| <b>Leimane <i>et al.</i> 2005 [28]</b>                   | N/A  |

**Supplemental Table 1:** Proportion of data missing amongst participants with DM.

**Data Missing (default/data unaccounted for/lost to follow up/transfer out)**

|                                              |      |
|----------------------------------------------|------|
| <b>Park <i>et al.</i> 1996 [15]</b>          | 0.16 |
| <b>Shah <i>et al.</i> 2008 [49]</b>          | 0.03 |
| <b>Eker <i>et al.</i> 2008 [61]</b>          | N/A  |
| <b>O'Donnell <i>et al.</i> 2009 [55]</b>     | N/A  |
| <b>Brust <i>et al.</i> 2010 [53]</b>         | 0.75 |
| <b>Dheda <i>et al.</i> 2010 [13]</b>         | N/A  |
| <b>Farley <i>et al.</i> 2011 [64]</b>        | 0.21 |
| <b>Kvasnovsky <i>et al.</i> 2011 [48]</b>    | N/A  |
| <b>Bendayan <i>et al.</i> 2011 [63]</b>      | N/A  |
| <b>Kurbatova <i>et al.</i> 2012 [68]</b>     | 0.30 |
| <b>Seddon <i>et al.</i> 2012 [11]</b>        | N/A  |
| <b>Satti <i>et al.</i> 2012 [65]</b>         | 0.02 |
| <b>Gegia <i>et al.</i> 2012 [45]</b>         | N/A  |
| <b>Gandhi <i>et al.</i> 2012 [72]</b>        | N/A  |
| <b>Oliveira <i>et al.</i> 2013 [69]</b>      | N/A  |
| <b>Kuksa <i>et al.</i> 2014 [60]</b>         | N/A  |
| <b>Dolgusev <i>et al.</i> 2014 [66]</b>      | N/A  |
| <b>Hicks <i>et al.</i> 2014 [57]</b>         | N/A  |
| <b>Charles <i>et al.</i> 2014 [76]</b>       | 0.04 |
| <b>Chung-Delgado <i>et al.</i> 2014 [81]</b> | N/A  |
| <b>Khaliouk <i>et al.</i> 2014 [67]</b>      | 0.03 |
| <b>Elliott <i>et al.</i> 2014 [50]</b>       | N/A  |
| <b>Duraisamy <i>et al.</i> 2014 [12]</b>     | N/A  |
| <b>Marais <i>et al.</i> 2014 [78]</b>        | 0.26 |
| <b>Oladimeji <i>et al.</i> 2014 [56]</b>     | N/A  |
| <b>Kuaban <i>et al.</i> 2015 [52]</b>        | N/A  |
| <b>Meressa <i>et al.</i> 2015 [43]</b>       | 0.07 |
| <b>Kempker <i>et al.</i> 2015 [44]</b>       | N/A  |
| <b>Van Altena <i>et al.</i> 2016 [54]</b>    | 0.14 |
| <b>Akshata <i>et al.</i> 2016 [82]</b>       | N/A  |
| <b>Phuong <i>et al.</i> 2016 [59]</b>        | N/A  |

**Supplemental Table 2:** Proportion of data missing amongst participants with HIV.

**Data Missing (default/data unaccounted  
for/lost to follow up/transfer out)**

|                                           |      |
|-------------------------------------------|------|
| <b>Ahmad <i>et al.</i> 2015 [58]</b>      | 0.03 |
| <b>Cegielski <i>et al.</i> 2016 [14]</b>  | 0.21 |
| <b>Dheda <i>et al.</i> 2010 [13]</b>      | N/A  |
| <b>Duraisamy <i>et al.</i> 2014 [12]</b>  | N/A  |
| <b>Gegia <i>et al.</i> 2012 [45]</b>      | N/A  |
| <b>Kurbatova <i>et al.</i> 2012 [68]</b>  | 0.11 |
| <b>Lalor <i>et al.</i> 2013 [71]</b>      | 0.28 |
| <b>Pazarli <i>et al.</i> 2013 [74]</b>    | N/A  |
| <b>Tang <i>et al.</i> 2013 [34]</b>       | N/A  |
| <b>Vashakidze <i>et al.</i> 2013 [51]</b> | N/A  |

**Supplemental Table 3:** Proportion of data missing amongst participants that smoke.



**Data Missing (default/data unaccounted for/lost to follow up/transfer out)**

|                                           |      |
|-------------------------------------------|------|
| <b>Bendayan <i>et al.</i> 2011 [63]</b>   | N/A  |
| <b>Cegielski <i>et al.</i> 2016 [14]</b>  | 0.22 |
| <b>Cox <i>et al.</i> 2007 [62]</b>        | 0.35 |
| <b>Duraisamy <i>et al.</i> 2014 [12]</b>  | N/A  |
| <b>Franke <i>et al.</i> 2008 [70]</b>     | 0.32 |
| <b>Gegia <i>et al.</i> 2012 [45]</b>      | N/A  |
| <b>Jain <i>et al.</i> 2014 [75]</b>       | N/A  |
| <b>Kuksa <i>et al.</i> 2014 [60]</b>      | N/A  |
| <b>Kurbatova <i>et al.</i> 2012 [68]</b>  | 0.22 |
| <b>Lalor <i>et al.</i> 2013 [71]</b>      | 0.30 |
| <b>Leimane <i>et al.</i> 2005 [28]</b>    | 0.15 |
| <b>Miller <i>et al.</i> 2012 [46]</b>     | 0.29 |
| <b>Oliveira <i>et al.</i> 2013 [69]</b>   | N/A  |
| <b>Shin <i>et al.</i> 2006 [77]</b>       | N/A  |
| <b>Vashakidze <i>et al.</i> 2013 [51]</b> | N/A  |

**Supplemental Table 4:** Proportion of data missing amongst participants with alcohol misuse.

|                                              | <b>ART proportion</b>     |
|----------------------------------------------|---------------------------|
| <b>Park <i>et al.</i> 1996 [15]</b>          | 1                         |
| <b>Shah <i>et al.</i> 2008 [49]</b>          | N/A                       |
| <b>Eker <i>et al.</i> 2008 [61]</b>          | N/A                       |
| <b>O'Donnell <i>et al.</i> 2009 [55]</b>     | N/A                       |
| <b>Brust <i>et al.</i> 2010 [53]</b>         | 1 (44% started pre TB tx) |
| <b>Dheda <i>et al.</i> 2010 [13]</b>         | N/A                       |
| <b>Farley <i>et al.</i> 2011 [64]</b>        | 0.63                      |
| <b>Kvasnovsky <i>et al.</i> 2011 [48]</b>    | N/A                       |
| <b>Bendayan <i>et al.</i> 2011 [63]</b>      | N/A                       |
| <b>Kurbatova <i>et al.</i> 2012 [68]</b>     | N/A                       |
| <b>Seddon <i>et al.</i> 2012 [11]</b>        | N/A                       |
| <b>Satti <i>et al.</i> 2012 [65]</b>         | N/A                       |
| <b>Gegia <i>et al.</i> 2012 [45]</b>         | 0.28                      |
| <b>Gandhi <i>et al.</i> 2012 [72]</b>        | N/A                       |
| <b>Oliveira <i>et al.</i> 2013 [69]</b>      | N/A                       |
| <b>Kuksa <i>et al.</i> 2014 [60]</b>         | N/A                       |
| <b>Dolgusev <i>et al.</i> 2014 [66]</b>      | 0.40                      |
| <b>Hicks <i>et al.</i> 2014 [57]</b>         | 0.73                      |
| <b>Charles <i>et al.</i> 2014 [76]</b>       | N/A                       |
| <b>Chung-Delgado <i>et al.</i> 2014 [81]</b> | N/A                       |
| <b>Khaliuaukin <i>et al.</i> 2014 [67]</b>   | 0.55                      |
| <b>Elliott <i>et al.</i> 2014 [50]</b>       | 0.86                      |
| <b>Duraisamy <i>et al.</i> 2014 [12]</b>     | N/A                       |
| <b>Marais <i>et al.</i> 2014 [78]</b>        | 0.98                      |
| <b>Oladimeji <i>et al.</i> 2014 [56]</b>     | 0.67                      |
| <b>Kuaban <i>et al.</i> 2015 [52]</b>        | N/A                       |
| <b>Meressa <i>et al.</i> 2015 [43]</b>       | N/A                       |
| <b>Kempker <i>et al.</i> 2015 [44]</b>       | N/A                       |
| <b>Van Altena <i>et al.</i> 2016 [54]</b>    | 0.53                      |
| <b>Akshata <i>et al.</i> 2016 [82]</b>       | 0.96                      |
| <b>Phuong <i>et al.</i> 2016 [59]</b>        | N/A                       |
| <b>Park <i>et al.</i> 1996 [15]</b>          | N/A                       |
| <b>Shah <i>et al.</i> 2008 [49]</b>          | N/A                       |
| <b>Eker <i>et al.</i> 2008 [61]</b>          | 0.24                      |

**Supplemental Table 5:** Proportion of participants with HIV on ART.

**Current vs ever smoker**

|                                           |         |
|-------------------------------------------|---------|
| <b>Ahmad <i>et al.</i> 2015 [58]</b>      | Ever    |
| <b>Cegielski <i>et al.</i> 2016 [14]</b>  | Ever    |
| <b>Dheda <i>et al.</i> 2010 [13]</b>      | Ever    |
| <b>Duraisamy <i>et al.</i> 2014 [12]</b>  | Ever    |
| <b>Gegia <i>et al.</i> 2012 [45]</b>      | Current |
| <b>Kurbatova <i>et al.</i> 2012 [68]</b>  | Ever    |
| <b>Lalor <i>et al.</i> 2013 [71]</b>      | Ever    |
| <b>Pazarli <i>et al.</i> 2013 [74]</b>    | Ever    |
| <b>Tang <i>et al.</i> 2013 [34]</b>       | Ever    |
| <b>Vashakidze <i>et al.</i> 2013 [51]</b> | Current |

**Supplemental Table 6:** Definition of smoker used in study.

| <b>Diabetics</b>                             | <b>Unadjusted Effect Estimate</b>              | <b>Adjusted Effect Estimate</b>                |
|----------------------------------------------|------------------------------------------------|------------------------------------------------|
| <b>Chung-Delgado <i>et al.</i> 2015 [32]</b> | Hazard Ratio (HR): 4.1<br>(95%CI:2.15-7.85)    | HR: 5.42<br>(95%CI:2.66-11.04)                 |
| <b>Kendall <i>et al.</i> 2013 [26]</b>       | HR: 0.36<br>(95%CI:0.05-2.69)                  | N/A                                            |
| <b>Leimane <i>et al.</i> 2005 [28]</b>       | HR: 2.5<br>(95%CI:0.7-8.5)                     | N/A                                            |
| <b>Liu <i>et al.</i> 2011 [27]</b>           | OR: 0.65<br>(95%CI:0.37-1.14)-MDR<br>data only | OR: 0.73<br>(95%CI:0.38-1.43) MDR<br>data only |
| <b>Tang <i>et al.</i> 2013 [34]</b>          | N/A                                            | OR: 0.305<br>(95%CI: 0.140-0.663)              |

**Supplemental Table 7:** Effect estimates for combined negative treatment outcomes in participants with DM from studies that did not provide raw data.

| HIV                                          | Unadjusted Effect Estimate     | Adjusted Effect Estimate        |
|----------------------------------------------|--------------------------------|---------------------------------|
| <b>Mitnick <i>et al.</i> 2013 [25]</b>       | HR: 3.16<br>(95%CI: 1.29-7.74) | HR: 2.72<br>(95%CI: 1.03-7.24)  |
| <b>Pietersen <i>et al.</i> 2015 [30]</b>     | N/A                            | OR: 2.9<br>(95%CI: 1.34-6.3)    |
| <b>Kendall <i>et al.</i> 2013 [26]</b>       | HR: 0.61<br>(95%CI: 0.32-1.14) | N/A                             |
| <b>Seung <i>et al.</i> 2009 [29]</b>         | OR: 1.9<br>(95%CI: 0.65-6.5)   | N/A                             |
| <b>Velasquez <i>et al.</i> 2014 [31]</b>     | HR: 1.7<br>(95%CI: 0.41-7.03)  | HR: 3.4<br>(95%CI: 0.72-16.2)   |
| <b>Chung-Delgado <i>et al.</i> 2015 [32]</b> | HR: 2.33<br>(95%CI: 0.83-6.51) | HR: 3.18<br>(95%CI: 1.05-9.69)  |
| <b>Kliiman <i>et al.</i> 2009 [33]</b>       | N/A                            | OR: 10.16<br>(95%CI: 1.17-88.4) |

**Supplemental Table 8:** Effect estimates for combined negative treatment outcomes in participants with HIV from studies that did not provide raw data.

| <b>Smokers</b>                               | <b>Unadjusted Effect Estimate</b> | <b>Adjusted Effect Estimate</b> |
|----------------------------------------------|-----------------------------------|---------------------------------|
| <b>Kendall <i>et al.</i> 2013 [26]</b>       | HR: 2.02<br>(95%CI: 1.01-4.05)    | N/A                             |
| <b>Chung-Delgado <i>et al.</i> 2015 [32]</b> | HR: 0.4<br>(95%CI: 0.12-1.29)     | N/A                             |

**Supplemental Table 9:** Effect estimates for combined negative treatment outcomes in participants that smoked from studies that did not provide raw data.

| <b>Alcohol Misuse</b>                        | <b>Unadjusted Effect Estimate</b> | <b>Adjusted Effect Estimate</b> |
|----------------------------------------------|-----------------------------------|---------------------------------|
| <b>Kendall <i>et al.</i> 2013 [26]</b>       | HR: 2.24<br>(95%CI: 1.22-4.13)    | HR: 2.11<br>(95%CI: 1.11-4.02)  |
| <b>Chung-Delgado <i>et al.</i> 2015 [32]</b> | N/A                               | HR: 0.51<br>(95%CI: 0.21-1.20)  |
| <b>Kliiman <i>et al.</i> 2009 [33]</b>       | OR: 2.42<br>(95%CI: 1.34-4.37)    | OR: 1.94<br>(95%CI: 0.96-3.92)  |

**Supplemental Table 10:** Effect estimates combined negative treatment outcomes in participants with alcohol misuse from studies that did not provide raw
